# Supplementary material for: Indoor cannabis smoke and children's health
Source: PubMed Central journal article supplement — Prev Med Rep. 2019 Mar 16;14:100853. doi: 10.1016/j.pmedr.2019.100853 (PMC6441784; doi:10.1016/j.pmedr.2019.100853), 2019-03-16
Supplement: mmc1.pdf [file mmc1.pdf]

## Supplemental Material

**Supplemental Table 1:** Association of number of past-year adverse health outcomes with indoor cannabis smoke exposure, in three ordinal logistic regression models (sensitivity analyses; n=190)

| Variable              | OR   | Model 1<br>(95% CI) | p-value | aOR  | Model 2<br>(95% CI) | p-value | aOR  | Model 3<br>(95% CI) | p-value |
|-----------------------|------|---------------------|---------|------|---------------------|---------|------|---------------------|---------|
| Indoor Cannabis Smoke |      |                     | 0.12    |      |                     | 0.10    |      |                     | 0.08    |
| None                  | 1.00 | (reference)         |         | 1.00 | (reference)         |         | 1.00 | (reference)         |         |
| Any                   | 1.75 | (0.86-3.54)         |         | 1.84 | (0.89-3.81)         |         | 1.95 | (0.92-4.15)         |         |

The three-level health outcome variable was used as the dependent variable in all 3 models.

Specifications of independent variables in the 3 models were as follows:

Model 1: Indoor cannabis smoking

Model 2: Model 1, and age of child, and education level of parent (or guardian)

Model 3: Model 2, and indoor cigarette smoking

OR = Odds ratio

aOR = Adjusted odds ratio

CI = Confidence interval
